# Supplementary material for: A missense variant in CST3 exerts a recessive effect on susceptibility to age-related macular degeneration resembling its association with Alzheimer’s disease
Source: PubMed Central journal article supplement (PMC4460273; doi:10.1007/s00439-015-1552-7), 2015-04-19
Supplement: 439_2015_1552_MOESM1_ESM.pdf [file 439_2015_1552_MOESM1_ESM.pdf]

## ELECTRONIC SUPPLEMENTARY MATERIAL

**A missense variant in *CST3* exerts a recessive effect on susceptibility to age-related macular degeneration resembling its association with Alzheimer's disease**

**Joe M. Butler · Umar Sharif · Manir Ali · Martin McKibbin · Joseph P. Thompson · Richard Gale · Yit C. Yang · Chris Inglehearn · Luminita Paraoan**

J. M. Butler and U. Sharif share first authorship

J. M. Butler · U. Sharif · L. Paraoan (△)

Department of Eye and Vision Science, Institute of Ageing and Chronic Disease, University of Liverpool, Liverpool, L69 3GA, United Kingdom

E-mail: lparaoan@liv.ac.uk

Tel.: +44 151 7064101

Fax: +44 151 706 5934

M. Ali · J. P. Thompson · C. Inglehearn

Ophthalmology and Neuroscience, University of Leeds, Leeds, LS9 7TF, United Kingdom

M. McKibbin

Ophthalmology Department, St James's University Hospital, Leeds, LS9 7TF, United Kingdom

R. Gale

Ophthalmology Department, The York Hospital, York, YO31 8HE, United Kingdom

Y. C. Yang

Ophthalmology, The Royal Wolverhampton NHS Trust, Wolverhampton, WV10 0QP, United Kingdom.

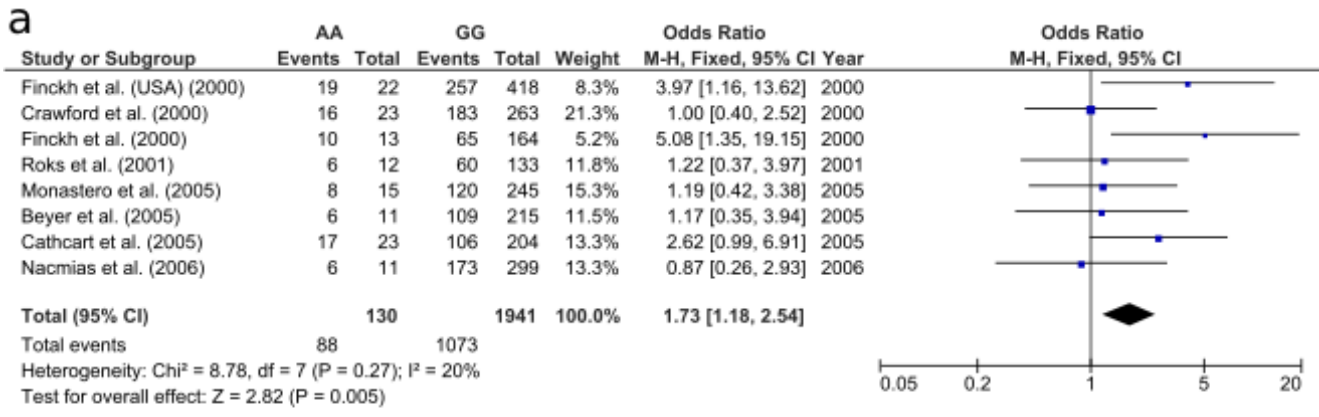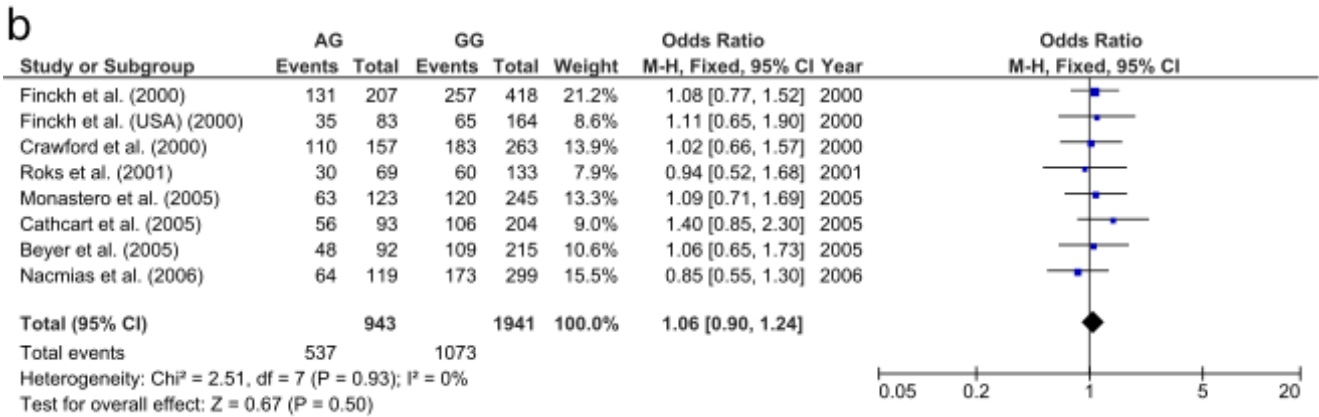

**Fig. S1** Forest plots for the meta-analysis of *CST3* rs1064039 with respect to Alzheimer’s disease in the Caucasian population using a fixed effects model. Area of the squares represents the weight of the study and horizontal bars represent 95% confidence interval of the OR. Applied to (a) “AA” genotype versus genotypes [data taken directly from Hua et al. (2012)] and (b) “AG” genotype versus “GG” genotype [data inferred from Hua et al. (2012)]

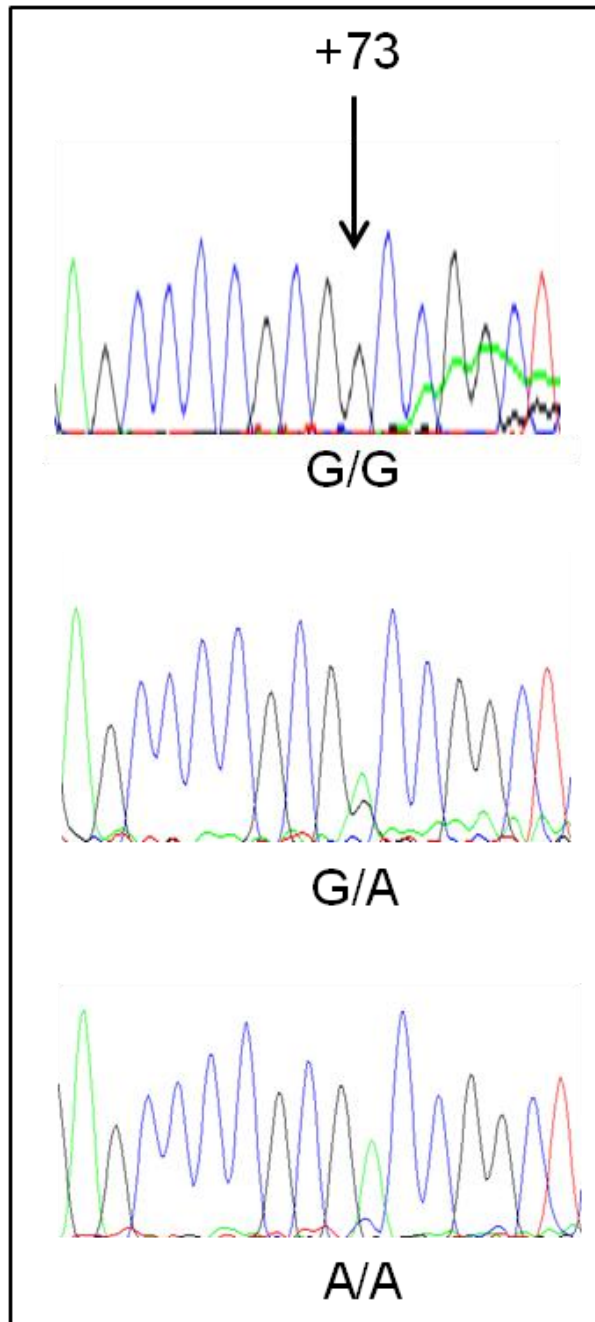

**Fig. S2** Representative chromatograms of the three genotypes at rs1064039. Colour of peaks represents the different nucleotides (green=A, black=G, blue=C, red=T). The PCR products were generated using primers CST3RIIF and CST3LIIR and sequenced using CST3BIIR
